# Supplementary material
Source: PubMed Central journal article supplement (PMC373305)
Supplement: nar_32_1_e12__1.pdf [file nar_32_1_e12__1.pdf]

## Supplementary Material

**Table S1**

| ORF       | Gene   | Process                                | Predicted Localization | RELIE F rank | ANOVA rank | SAM score | CIIR gene | High dose 200Gy |
|-----------|--------|----------------------------------------|------------------------|--------------|------------|-----------|-----------|-----------------|
| YAL049C   |        | unknown                                | Cytoplasm              | 190          | 495        | 2.49      | ind       | ind             |
| YBR014C   |        | unknown                                | ER-related             | 78           | 24         | 3.53      | ind       | ind             |
| YBR039W   | ATP3   | ATP synthesis                          | Mitochondria           | 385          | 232        | 2.92      | ind       | ind             |
| YBR162W-A | YSY6   | secretion (putative)                   |                        | 366          | 463        | 2.92      | ind       | ind             |
| YBR230C   |        | unknown                                | Mitochondria           | 14           | 234        | 4.16      | ind       | ind             |
| YBR268W   | MRPL37 | protein synthesis                      | Mitochondria           | 123          | 154        | 3.8       | ind       | ind             |
| YCL046W   |        | unknown                                | Cytoplasm              | 237          | 204        | 2.57      | ind       | ind             |
| YDL004W   | ATP16  | ATP synthesis                          | Mitochondria           | 430          | 226        | 2.93      | ind       | ind             |
| YDL181W   | INH1   | ATP synthesis                          | Cytoplasm              | 37           | 94         | 4.24      | ind       | ind             |
| YDR298C   | ATP5   | ATP synthesis                          | Mitochondria           | 169          | 397        | 2.8       | ind       | ind             |
| YDR322C-A | TIM11  | ATP synthesis                          |                        | 194          | 225        | 3.84      | ind       | ind             |
| YDR373W   | FRQ1   | unknown                                | Cytoplasm              | 91           | 16         | 4.44      | ind       | ind             |
| YDR377W   | ATP17  | ATP synthesis                          | Mitochondria           | 56           | 54         | 4.43      | ind       | ind             |
| YDR479C   |        | unknown                                | Nucleus                | 221          | 71         | 3.32      | ind       | ind             |
| YDR511W   |        | unknown                                | Mitochondria           | 13           | 1          | 4.97      | ind       | ind             |
| YDR513W   | TTR1   | electron carrier                       | ER-related             | 84           | 244        | 3.07      | ind       | ind             |
| YDR529C   | QCR7   | respiration                            | Cytoplasm              | 22           | 341        | 3.75      | ind       | ind             |
| YEL020C   |        | unknown                                | Nucleus                | 230          | 178        | 2.96      | ind       | ind             |
| YER019C-A | SBH2   | secretion                              |                        | 120          | 323        | 3.07      | ind       | ind             |
| YER072W   | NRF1   | signaling, polarized growth (putative) | Membrane-related       | 111          | 119        | 3.76      | ind       | ind             |
| YER183C   |        | unknown                                | Mitochondria           | 212          | 320        | 3.11      | ind       | ind             |
| YFL030W   |        | unknown                                | Cytoplasm              | 34           | 398        | 3.69      | ind       | ind             |
| YFR029W   | PTR3   | transport                              | Nucleus                | 448          | 101        | 3.3       | ind       | ind             |
| YGL087C   | MMS2   | DNA repair, postreplication            | Cytoplasm              | 117          | 49         | 3.82      | ind       | ind             |
| YGL187C   | COX4   | oxidative phosphorylation              | Mitochondria           | 82           | 295        | 3.7       | ind       | ind             |
| YGL188C   |        | unknown                                | Mitochondria           | 21           | 151        | 4.43      | ind       | ind             |
| YGL191W   | COX13  | oxidative phosphorylation              | Mitochondria           | 43           | 179        | 3.85      | ind       | ind             |
| YGR063C   | SPT4   | transcription                          | Cytoplasm              | 219          | 92         | 2.98      | ind       | ind             |
| YGR076C   | MRPL25 | protein synthesis                      | Cytoplasm              | 247          | 64         | 3.55      | ind       | ind             |
| YGR137W   |        | unknown                                | Membrane-related       | 96           | 140        | 3.05      | ind       | ind             |
| YGR234W   | YHB1   | oxidative stress response (putative)   | Cytoplasm              | 5            | 10         | 5.37      | ind       | ind             |
| YHR001W-A | QCR10  | oxidative phosphorylation              |                        | 18           | 15         | 5.18      | ind       | ind             |

|           |        |                           |                  |     |     |      |     |     |
|-----------|--------|---------------------------|------------------|-----|-----|------|-----|-----|
| YHR051W   | COX6   | oxidative phosphorylation | Mitochondria     | 101 | 299 | 3.61 | ind | ind |
| YHR053C   | CUP1-1 | Cu2+ ion homeostasis      | Cytoplasm        | 53  | 152 | 3.29 | ind | ind |
| YHR055C   | CUP1-2 | Cu2+ ion homeostasis      | Cytoplasm        | 89  | 200 | 2.75 | ind | ind |
| YHR056C   |        | unknown                   | Nucleus          | 493 | 156 | 2.92 | ind | ind |
| YHR138C   |        | unknown                   | ER-related       | 201 | 378 | 2.87 | ind | ind |
| YJR077C   | MIR1   | transport                 | Mitochondria     | 49  | 300 | 3.78 | ind | ind |
| YJR095W   | SFC1   | transport                 | Nucleus          | 2   | 59  | 4.15 | ind | ind |
| YJR104C   | SOD1   | oxidative stress response | Cytoplasm        | 127 | 8   | 5.09 | ind | ind |
| YKL016C   | ATP7   | ATP synthesis             | Cytoplasm        | 172 | 13  | 4.02 | ind | ind |
| YKL150W   | MCR1   | electron carrier          | ER-related       | 104 | 465 | 2.77 | ind | ind |
| YKL170W   | MRPL38 | protein synthesis         | Mitochondria     | 481 | 455 | 2.54 | ind | ind |
| YLR038C   | COX12  | oxidative phosphorylation | Cytoplasm        | 8   | 74  | 4.92 | ind | ind |
| YML081C-A | ATP18  | ATP synthesis (putative)  |                  | 38  | 4   | 4.36 | ind | ind |
| YML090W   |        | unknown                   | ER-related       | 149 | 377 | 3.42 | ind | ind |
| YMR158W   |        | unknown                   | Mitochondria     | 182 | 57  | 3.26 | ind | ind |
| YMR242C   | RPL20A | protein synthesis         | Cytoplasm        | 81  | 476 | 2.85 | ind | ind |
| YMR256C   | COX7   | oxidative phosphorylation | Mitochondria     | 20  | 247 | 3.44 | ind | ind |
| YNL052W   | COX5A  | oxidative phosphorylation | Mitochondria     | 54  | 307 | 4.12 | ind | ind |
| YNL147W   | LSM7   | mRNA splicing (putative)  | Mitochondria     | 273 | 248 | 2.85 | ind | ind |
| YNR032C-A |        | unknown                   |                  | 125 | 75  | 3.22 | ind | ind |
| YOL077W-A | ATP19  | ATP synthesis             |                  | 17  | 5   | 4.99 | ind | ind |
| YOL143C   | RIB4   | riboflavin biosynthesis   | Cytoplasm        | 114 | 159 | 3.19 | ind | ind |
| YOL159C   |        | unknown                   | ER-related       | 223 | 45  | 3.33 | ind | ind |
| YOR065W   | CYT1   | oxidative phosphorylation | Mitochondria     | 378 | 362 | 3.41 | ind | ind |
| YPL183W-A |        | protein synthesis         |                  | 492 | 440 | 2.68 | ind | ind |
| YPL261C   |        | unknown                   | ER-related       | 73  | 25  | 3.89 | ind | ind |
| YPL271W   | ATP15  | ATP synthesis             | Mitochondria     | 12  | 17  | 5.13 | ind | ind |
| YPR020W   | ATP20  | ATP synthesis             | Cytoplasm        | 35  | 52  | 4.89 | ind | ind |
| YPR058W   | YMC1   | transport                 | Mitochondria     | 320 | 412 | 2.32 | ind | ind |
| YPR094W   |        | unknown                   | Mitochondria     | 162 | 30  | 3.88 | ind | ind |
| YPR146C   |        | unknown                   | Membrane-related | 68  | 106 | 3.35 | ind | ind |
| YPR151C   |        | unknown                   | Cytoplasm        | 121 | 473 | 3.3  | ind | ind |
| YBL026W   | LSM2   | mRNA splicing             | Mitochondria     | 467 | 86  | 3.76 | ind | no  |
| YBL050W   | SEC17  | secretion                 | Nucleus          | 469 | 288 | 2.87 | ind | no  |
| YBR047W   |        | unknown                   | Cytoplasm        | 30  | 23  | 4.25 | ind | no  |
| YBR050C   | REG2   | glucose repression        | Nucleus          | 16  | 77  | 3.99 | ind | no  |
| YBR077C   |        | unknown                   | Cytoplasm        | 354 | 66  | 3.49 | ind | no  |
| YBR089C-A | NHP6B  | chromatin structure       |                  | 257 | 273 | 2.97 | ind | no  |
| YBR262C   |        | unknown                   | Mitochondria     | 152 | 308 | 3    | ind | no  |

|         |       |                                                                 |                  |     |     |      |     |    |
|---------|-------|-----------------------------------------------------------------|------------------|-----|-----|------|-----|----|
| YCL025C | AGP1  | transport                                                       | Membrane-related | 386 | 386 | 3.01 | ind | no |
| YCR097W | A1    | transcription                                                   |                  | 131 | 89  | 3.66 | ind | no |
| YDL120W | YFH1  | iron homeostasis, mitochondrial                                 | Mitochondria     | 446 | 116 | 3.22 | ind | no |
| YDL200C | MGT1  | DNA repair                                                      | Mitochondria     | 228 | 202 | 3.07 | ind | no |
| YDL215C | GDH2  | glutamate metabolism                                            | Nucleus          | 483 | 395 | 2.75 | ind | no |
| YDR031W |       | unknown                                                         | Cytoplasm        | 375 | 185 | 2.93 | ind | no |
| YDR115W |       | unknown                                                         | Cytoplasm        | 215 | 215 | 2.93 | ind | no |
| YDR218C | SPR28 | sporulation                                                     | Cytoplasm        | 199 | 26  | 3.6  | ind | no |
| YDR231C | COX20 | respiration                                                     | Mitochondria     | 64  | 21  | 4.42 | ind | no |
| YDR264C | AKR1  | "signaling, pheromone pathway; endocytosis; cell shape control" | Membrane-related | 488 | 434 | 2.77 | ind | no |
| YDR378C | LSM6  | mRNA splicing (putative)                                        | Mitochondria     | 409 | 391 | 2.53 | ind | no |
| YEL006W |       | unknown                                                         | Mitochondria     | 258 | 38  | 3.45 | ind | no |
| YER010C |       | unknown                                                         | Nucleus          | 382 | 162 | 3.15 | ind | no |
| YER042W | MXR1  | oxidative stress response                                       | Cytoplasm        | 40  | 467 | 2.76 | ind | no |
| YER071C |       | unknown                                                         | Nucleus          | 179 | 48  | 3.8  | ind | no |
| YER092W |       | unknown                                                         | Cytoplasm        | 396 | 85  | 3.32 | ind | no |
| YER152C |       | unknown                                                         | Nucleus          | 372 | 303 | 2.23 | ind | no |
| YER174C | GRX4  | oxidative stress response                                       | Cytoplasm        | 63  | 18  | 4.2  | ind | no |
| YFR011C |       | unknown                                                         | Cytoplasm        | 359 | 411 | 3.12 | ind | no |
| YGL010W |       | unknown                                                         | Mitochondria     | 156 | 47  | 3.79 | ind | no |
| YGL033W | HOP2  | meiosis, chromosome pairing (putative)                          | Cytoplasm        | 477 | 96  | 2.68 | ind | no |
| YGL056C | SDS23 | unknown                                                         | Mitochondria     | 340 | 484 | 3.01 | ind | no |
| YGL136C |       | unknown                                                         | Nucleus          | 435 | 79  | 3.24 | ind | no |
| YGL154C | LYS5  | lysine biosynthesis                                             | Nucleus          | 102 | 181 | 3.18 | ind | no |
| YGL220W |       | unknown                                                         | Mitochondria     | 250 | 268 | 2.86 | ind | no |
| YGL249W | ZIP2  | meiosis, synapsis                                               | Nucleus          | 373 | 188 | 2.82 | ind | no |
| YGR133W | PEX4  | protein degradation, ubiquitin-mediated                         | Cytoplasm        | 352 | 109 | 2.79 | ind | no |
| YGR220C | MRPL9 | protein synthesis                                               | Mitochondria     | 155 | 50  | 3.75 | ind | no |
| YGR235C |       | unknown                                                         | Mitochondria     | 39  | 39  | 4.11 | ind | no |
| YHL043W | ECM34 | cell wall biogenesis                                            | Membrane-related | 452 | 171 | 2.96 | ind | no |
| YHR058C | MED6  | transcription                                                   | Nucleus          | 305 | 127 | 2.9  | ind | no |
| YHR110W | ERP5  | "membrane trafficking; secretion (putative)"                    | ER-related       | 92  | 7   | 4.57 | ind | no |

|           |        |                                         |                  |     |     |      |     |    |
|-----------|--------|-----------------------------------------|------------------|-----|-----|------|-----|----|
| YHR121W   |        | unknown                                 | Mitochondria     | 175 | 28  | 3.75 | ind | no |
| YHR132C   | ECM14  | cell wall biogenesis                    | ER-related       | 420 | 147 | 2.57 | ind | no |
| YHR136C   | SPL2   | cell cycle                              | Cytoplasm        | 44  | 3   | 4.42 | ind | no |
| YIL057C   |        | unknown                                 | Cytoplasm        | 75  | 393 | 3.52 | ind | no |
| YIL098C   | FMC1   | respiration (putative)                  | Mitochondria     | 342 | 104 | 3.51 | ind | no |
| YIL112W   |        | unknown                                 | Nucleus          | 206 | 183 | 3.32 | ind | no |
| YIR017C   | MET28  | sulfur amino acid metabolism            | Cytoplasm        | 137 | 186 | 3.17 | ind | no |
| YIR029W   | DAL2   | allantoin utilization                   | Cytoplasm        | 67  | 143 | 3.99 | ind | no |
| YJL037W   |        | unknown                                 | Membrane-related | 450 | 84  | 3.02 | ind | no |
| YJL102W   | MEF2   | protein synthesis                       | Mitochondria     | 308 | 357 | 2.58 | ind | no |
| YJL205C-A | NCE101 | secretion, non-classical                |                  | 245 | 306 | 2.86 | ind | no |
| YJR078W   |        | unknown                                 | Nucleus          | 174 | 122 | 2.94 | ind | no |
| YKL002W   |        | unknown                                 | Cytoplasm        | 252 | 135 | 3.33 | ind | no |
| YKL058W   | TOA2   | transcription                           | Cytoplasm        | 318 | 118 | 3.33 | ind | no |
| YKL067W   | YNK1   | nucleotide metabolism                   | Cytoplasm        | 42  | 139 | 3.48 | ind | no |
| YKR088C   |        | unknown                                 | Membrane-related | 278 | 157 | 2.93 | ind | no |
| YLR041W   |        | unknown                                 | Mitochondria     | 433 | 444 | 3.16 | ind | no |
| YLR174W   | IDP2   | TCA cycle                               | Cytoplasm        | 62  | 490 | 3.5  | ind | no |
| YLR236C   |        | unknown                                 |                  | 188 | 70  | 3.57 | ind | no |
| YLR262C-A |        | unknown                                 |                  | 146 | 446 | 2.57 | ind | no |
| YLR267W   | BOP2   | unknown                                 | Nucleus          | 417 | 482 | 2.42 | ind | no |
| YLR337C   | VRP1   | cytoskeleton                            |                  | 351 | 37  | 2.4  | ind | no |
| YLR375W   | STP3   | tRNA splicing                           | Nucleus          | 427 | 325 | 3.15 | ind | no |
| YLR377C   | FBP1   | gluconeogenesis                         | Cytoplasm        | 1   | 91  | 5.58 | ind | no |
| YLR385C   |        | unknown                                 | ER-related       | 324 | 217 | 2.82 | ind | no |
| YLR395C   | COX8   | oxidative phosphorylation               | Mitochondria     | 61  | 76  | 3.97 | ind | no |
| YML114C   |        | unknown                                 | Nucleus          | 281 | 124 | 3.31 | ind | no |
| YMR022W   | QRI8   | protein degradation, ubiquitin-mediated | Cytoplasm        | 128 | 27  | 4.2  | ind | no |
| YMR035W   | IMP2   | protein processing                      | Mitochondria     | 31  | 2   | 5.02 | ind | no |
| YMR056C   | AAC1   | transport                               | Mitochondria     | 86  | 206 | 3.66 | ind | no |
| YMR126C   |        | unknown                                 | Membrane-related | 292 | 113 | 3.08 | ind | no |
| YMR157C   |        | unknown                                 | Mitochondria     | 140 | 33  | 3.88 | ind | no |
| YMR264W   | CUE1   | protein degradation, ubiquitin-mediated | ER-related       | 109 | 19  | 4.16 | ind | no |
| YMR281W   | GPI12  | protein processing (putative)           | ER-related       | 332 | 65  | 3.33 | ind | no |
| YNL133C   |        | unknown                                 | Cytoplasm        | 97  | 41  | 3.89 | ind | no |
| YNL285W   |        | unknown                                 | Cytoplasm        | 414 | 275 | 2.69 | ind | no |

|           |       |                                   |                  |     |     |       |     |    |
|-----------|-------|-----------------------------------|------------------|-----|-----|-------|-----|----|
| YNR002C   | FUN34 | unknown                           | Membrane-related | 100 | 452 | 3.42  | ind | no |
| YOL053W   |       | unknown                           | Mitochondria     | 353 | 56  | 3.08  | ind | no |
| YOL081W   | IRA2  | signaling, Ras pathway            | Nucleus          | 99  | 409 | 3.02  | ind | no |
| YOL099C   |       | unknown                           | Membrane-related | 404 | 240 | 3     | ind | no |
| YOL111C   |       | unknown                           | Mitochondria     | 337 | 88  | 3.31  | ind | no |
| YOL129W   |       | unknown                           | Membrane-related | 254 | 375 | 2.66  | ind | no |
| YOR064C   |       | unknown                           | Nucleus          | 55  | 43  | 4.19  | ind | no |
| YOR100C   | CRC1  | transport                         | Cytoplasm        | 428 | 197 | 3.32  | ind | no |
| YOR169C   |       | unknown                           | Nucleus          | 271 | 150 | 3.11  | ind | no |
| YOR170W   |       | unknown                           | Mitochondria     | 153 | 175 | 3.17  | ind | no |
| YOR196C   | LIP5  | fatty acid metabolism             | Mitochondria     | 238 | 73  | 3.54  | ind | no |
| YOR286W   |       | unknown                           | Cytoplasm        | 285 | 218 | 2.83  | ind | no |
| YPL147W   | PXA1  | transport                         | Nucleus          | 211 | 457 | 2.19  | ind | no |
| YPL156C   |       | unknown                           | Membrane-related | 83  | 12  | 4.1   | ind | no |
| YPL200W   |       | unknown                           | ER-related       | 405 | 128 | 3.47  | ind | no |
| YPL201C   |       | unknown                           | Cytoplasm        | 3   | 32  | 4.7   | ind | no |
| YPL275W   |       | unknown                           | Mitochondria     | 15  | 399 | 1.29  | ind | no |
| YPR082C   | DIB1  | unknown                           | Cytoplasm        | 110 | 87  | 4.09  | ind | no |
| YPR098C   |       | unknown                           | Mitochondria     | 425 | 195 | 2.86  | ind | no |
| YPR099C   |       | unknown                           | ER-related       | 144 | 20  | 4.05  | ind | no |
| YPR193C   | HPA2  | chromatin structure               | Cytoplasm        | 132 | 447 | 3.35  | ind | no |
| YAL064W-B |       | unknown                           |                  | 475 | 172 | -2.79 | rep | no |
| YBL069W   | AST1  | plasma membrane protein targeting | Nucleus          | 184 | 11  | -3.27 | rep | no |
| YBR042C   |       | unknown                           | ER-related       | 148 | 14  | -3.54 | rep | no |
| YBR060C   | ORC2  | DNA replication                   | Nucleus          | 406 | 333 | -2.37 | rep | no |
| YCR049C   |       | unknown                           | Nucleus          | 436 | 219 | -2.49 | rep | no |
| YDL028C   | MPS1  | mitosis, checkpoint               | Nucleus          | 243 | 100 | -2.76 | rep | no |
| YDL071C   |       | unknown                           | ER-related       | 207 | 213 | -2.57 | rep | no |
| YDL187C   |       | unknown                           | Cytoplasm        | 25  | 42  | -3.29 | rep | no |
| YDL246C   |       | unknown                           | Cytoplasm        | 171 | 481 | -2.13 | rep | no |
| YDL247W   |       | unknown                           | Membrane-related | 133 | 260 | -2.47 | rep | no |
| YDR021W   | FAL1  | rRNA processing                   | Nucleus          | 95  | 170 | -2.57 | rep | no |
| YDR052C   | DBF4  | cell cycle                        | Nucleus          | 189 | 448 | -2.37 | rep | no |
| YDR221W   |       | unknown                           | ER-related       | 288 | 130 | -2.6  | rep | no |
| YDR257C   | RMS1  | transcription                     | Nucleus          | 347 | 294 | -2.24 | rep | no |
| YDR277C   | MTH1  | hexose transport                  | Nucleus          | 47  | 123 | -2.7  | rep | no |
| YDR331W   | GPI8  | protein processing                | ER-related       | 309 | 477 | -2.22 | rep | no |
| YDR379W   | RGA2  | signaling                         | Nucleus          | 439 | 351 | -2.41 | rep | no |
| YDR383C   |       | unknown                           | Nucleus          | 136 | 34  | -3.32 | rep | no |
| YEL047C   |       | unknown                           | ER-related       | 197 | 407 | -2.21 | rep | no |
| YER022W   | SRB4  | transcription                     | Nucleus          | 186 | 98  | -2.55 | rep | no |
| YER027C   | GAL83 | glucose repression                | Nucleus          | 260 | 340 | -2.19 | rep | no |

|           |       |                                           |                  |     |     |       |     |    |
|-----------|-------|-------------------------------------------|------------------|-----|-----|-------|-----|----|
| YER049W   |       | unknown                                   | Cytoplasm        | 24  | 492 | -2.63 | rep | no |
| YER187W-A | KHS1  | unknown                                   |                  | 151 | 310 | -2.4  | rep | no |
| YFL047W   |       | unknown                                   | Nucleus          | 248 | 315 | -2.12 | rep | no |
| YFL048C   | EMP47 | secretion                                 | ER-related       | 494 | 83  | -2.34 | rep | no |
| YFR012W   |       | unknown                                   | Membrane-related | 391 | 279 | -2.45 | rep | no |
| YFR039C   |       | unknown                                   | ER-related       | 434 | 257 | -2.56 | rep | no |
| YGL017W   | ATE1  | protein synthesis                         | Nucleus          | 402 | 313 | -2.27 | rep | no |
| YGL032C   | AGA2  | mating                                    | ER-related       | 225 | 134 | -2.8  | rep | no |
| YGL144C   |       | unknown                                   | Nucleus          | 139 | 168 | -2.52 | rep | no |
| YGL225W   | GOG5  | protein glycosylation                     | Membrane-related | 456 | 169 | -2.53 | rep | no |
| YGL228W   | SHE10 | unknown                                   | ER-related       | 113 | 405 | -2.41 | rep | no |
| YGL263W   | COS12 | unknown                                   | ER-related       | 422 | 192 | -2.32 | rep | no |
| YGR014W   | MSB2  | bud emergence                             | ER-related       | 246 | 253 | -2.48 | rep | no |
| YGR208W   | SER2  | glycine, serine, and threonine metabolism | Cytoplasm        | 51  | 31  | -3.29 | rep | no |
| YGR294W   |       | unknown                                   | ER-related       | 231 | 494 | -2.34 | rep | no |
| YHR047C   | AAP1' | protein degradation                       | Nucleus          | 226 | 439 | -2.32 | rep | no |
| YHR073W   |       | unknown                                   | Nucleus          | 441 | 103 | -2.63 | rep | no |
| YHR085W   |       | unknown                                   | Nucleus          | 253 | 274 | -2.56 | rep | no |
| YIL006W   |       | unknown                                   | Nucleus          | 363 | 389 | -2.47 | rep | no |
| YIL055C   |       | unknown                                   | Membrane-related | 295 | 141 | -2.57 | rep | no |
| YIL174W   |       | unknown                                   | Mitochondria     | 36  | 6   | -3.99 | rep | no |
| YIR010W   |       | unknown                                   | Nucleus          | 284 | 164 | -2.65 | rep | no |
| YJL025W   | RRN7  | transcription                             | Nucleus          | 167 | 51  | -3.01 | rep | no |
| YJL041W   | NSP1  | nuclear protein targeting                 | Nucleus          | 158 | 261 | -2.25 | rep | no |
| YJL051W   |       | unknown                                   | Membrane-related | 77  | 296 | -2.62 | rep | no |
| YJL105W   |       | unknown                                   | Nucleus          | 224 | 246 | -2.46 | rep | no |
| YJL110C   | GZF3  | nitrogen catabolism                       | Nucleus          | 445 | 435 | -2.36 | rep | no |
| YJL145W   |       | unknown                                   | Mitochondria     | 183 | 58  | -3.18 | rep | no |
| YJR003C   |       | unknown                                   | Cytoplasm        | 208 | 284 | -2.19 | rep | no |
| YJR064W   | CCT5  | protein targeting                         | Cytoplasm        | 423 | 441 | -2.12 | rep | no |
| YJR069C   | HAM1  | 6-N-hydroxylaminopyridine resistance      | Cytoplasm        | 412 | 40  | -3.02 | rep | no |
| YKL008C   | LAC1  | aging                                     | Membrane-related | 341 | 80  | -2.65 | rep | no |
| YKL062W   | MSN4  | transcription                             | Nucleus          | 418 | 321 | -2.14 | rep | no |
| YKL112W   | ABF1  | transcription                             | Nucleus          | 275 | 243 | -2.47 | rep | no |
| YKL144C   | RPC25 | transcription                             | Nucleus          | 209 | 22  | -3.34 | rep | no |
| YKL205W   | LOS1  | tRNA splicing                             | Nucleus          | 355 | 464 | -2.26 | rep | no |
| YKL223W   |       | unknown                                   | Mitochondria     | 307 | 271 | -2.56 | rep | no |
| YKL224C   |       | unknown                                   | ER-related       | 256 | 424 | -2.38 | rep | no |
| YKR027W   |       | unknown                                   | Nucleus          | 164 | 182 | -2.74 | rep | no |
| YKR043C   |       | unknown                                   | Cytoplasm        | 491 | 67  | -2.93 | rep | no |
| YLR042C   |       | unknown                                   | Membrane-related | 80  | 229 | -2.75 | rep | no |

|           |       |                                 |                  |     |     |       |     |     |
|-----------|-------|---------------------------------|------------------|-----|-----|-------|-----|-----|
| YLR084C   | RAX2  | cell polarity (putative)        | Membrane-related | 376 | 293 | -2.42 | rep | no  |
| YLR432W   |       | unknown                         | Cytoplasm        | 45  | 137 | -2.68 | rep | no  |
| YLR464W   |       | unknown                         | Nucleus          | 267 | 278 | -2.59 | rep | no  |
| YML062C   | MFT1  | mitochondrial protein targeting | Nucleus          | 299 | 61  | -2.89 | rep | no  |
| YML064C   | TEM1  | cell cycle                      | Nucleus          | 287 | 191 | -2.58 | rep | no  |
| YML128C   |       | unknown                         | ER-related       | 59  | 385 | -2.34 | rep | no  |
| YMR151W   | YIM2  | unknown                         | Membrane-related | 476 | 221 | -2.71 | rep | no  |
| YMR307W   | GAS1  | unknown                         | ER-related       | 269 | 107 | -2.68 | rep | no  |
| YNL065W   |       | unknown                         | Membrane-related | 33  | 238 | -2.77 | rep | no  |
| YOL064C   | MET22 | methionine biosynthesis         | Cytoplasm        | 447 | 239 | -2.02 | rep | no  |
| YOL156W   | HXT11 | transport                       | Membrane-related | 57  | 72  | -3.27 | rep | no  |
| YOL164W   |       | unknown                         | Nucleus          | 72  | 311 | -2.42 | rep | no  |
| YOR047C   | STD1  | glucose repression              | Mitochondria     | 487 | 198 | -2.41 | rep | no  |
| YOR051C   |       | unknown                         | Nucleus          | 4   | 62  | -3.6  | rep | no  |
| YPL021W   | ECM23 | cell wall biogenesis (putative) | Cytoplasm        | 319 | 292 | -2.44 | rep | no  |
| YPL023C   | MET12 | methionine biosynthesis         | Nucleus          | 142 | 167 | -2.66 | rep | no  |
| YPL245W   |       | unknown                         | Nucleus          | 124 | 111 | -2.61 | rep | no  |
| YPR076W   |       | unknown                         | Cytoplasm        | 322 | 414 | -1.99 | rep | no  |
| YPR136C   |       | unknown                         | Membrane-related | 239 | 417 | -2.19 | rep | no  |
| YAL035W   | FUN12 | unknown                         | Cytoplasm        | 93  | 302 | -2.67 | rep | rep |
| YAL053W   |       | unknown                         | Membrane-related | 65  | 99  | -2.72 | rep | rep |
| YAR073W   |       | unknown                         | Cytoplasm        | 165 | 304 | -2.36 | rep | rep |
| YBL039C   | URA7  | pyrimidine biosynthesis         | Cytoplasm        | 88  | 173 | -2.55 | rep | rep |
| YBR121C   | GRS1  | protein synthesis               | Cytoplasm        | 296 | 339 | -2.31 | rep | rep |
| YDR037W   | KRS1  | protein synthesis               | Cytoplasm        | 293 | 97  | -2.86 | rep | rep |
| YDR091C   |       | unknown                         | Nucleus          | 390 | 35  | -3.18 | rep | rep |
| YDR234W   | LYS4  | lysine biosynthesis             | Cytoplasm        | 115 | 55  | -2.88 | rep | rep |
| YDR398W   |       | unknown                         | Cytoplasm        | 298 | 371 | -2.52 | rep | rep |
| YEL075C   |       | unknown                         | Nucleus          | 138 | 451 | -2.42 | rep | rep |
| YEL076C-A |       | unknown                         |                  | 261 | 265 | -1.85 | rep | rep |
| YEL076W-C |       | unknown                         |                  | 9   | 429 | -2.47 | rep | rep |
| YER011W   | TIR1  | stress response (putative)      | ER-related       | 23  | 355 | -2.4  | rep | rep |
| YFR009W   | GCN20 | protein synthesis               | Cytoplasm        | 380 | 69  | -2.66 | rep | rep |
| YGL120C   | PRP43 | mRNA splicing                   | Cytoplasm        | 262 | 408 | -2.3  | rep | rep |
| YHL046C   |       | unknown                         | ER-related       | 191 | 425 | -2.51 | rep | rep |
| YHL049C   |       | unknown                         | ER-related       | 85  | 233 | -2.95 | rep | rep |
| YHR070W   |       | unknown                         | Nucleus          | 392 | 438 | -2.18 | rep | rep |

|         |        |                                  |                  |     |     |       |     |     |
|---------|--------|----------------------------------|------------------|-----|-----|-------|-----|-----|
| YHR092C | HXT4   | transport                        | Membrane-related | 315 | 330 | -2.65 | rep | rep |
| YHR137W | ARO9   | aromatic amino acid metabolism   | Nucleus          | 90  | 82  | -3    | rep | rep |
| YIL176C |        | unknown                          | ER-related       | 181 | 469 | -2.41 | rep | rep |
| YJL080C | SCP160 | mitosis, chromosome transmission | Cytoplasm        | 170 | 9   | -3.57 | rep | rep |
| YJL200C |        | unknown                          | Mitochondria     | 313 | 145 | -2.57 | rep | rep |
| YJR162C |        | unknown                          | Mitochondria     | 27  | 254 | -2.6  | rep | rep |
| YKL029C | MAE1   | pyruvate metabolism              | Mitochondria     | 41  | 190 | -2.61 | rep | rep |
| YLL011W | SOF1   | rRNA processing                  | Nucleus          | 300 | 207 | -2.34 | rep | rep |
| YLL048C | YBT1   | transport                        | Membrane-related | 69  | 331 | -2.29 | rep | rep |
| YLR060W | FRS1   | protein synthesis                | Cytoplasm        | 116 | 44  | -3.09 | rep | rep |
| YLR462W |        | unknown                          | Nucleus          | 6   | 163 | -3.07 | rep | rep |
| YOL057W |        | unknown                          | Cytoplasm        | 216 | 277 | -2.21 | rep | rep |
| YOL079W |        | unknown                          | Membrane-related | 154 | 459 | -2.32 | rep | rep |
| YOR168W | GLN4   | protein synthesis                | Nucleus          | 335 | 102 | -2.61 | rep | rep |
| YOR394W |        | unknown                          | Membrane-related | 187 | 142 | -3.15 | rep | rep |
| YPL044C |        | unknown                          | Nucleus          | 107 | 78  | -2.78 | rep | rep |
| YPL086C | ELP3   | chromatin structure              | Mitochondria     | 346 | 298 | -2.35 | rep | rep |
| YPL093W | NOG1   | unknown                          | Cytoplasm        | 276 | 496 | -2.18 | rep | rep |
| YPR203W |        | unknown                          | ER-related       | 26  | 235 | -2.96 | rep | rep |

**Table S1. List of the CIIR genes.** The name of the gene and the function and localisation of the protein are indicated in the first columns. The classification parameter given by each analytical method are indicated. In the two last columns we summerized our results on populations exposed to continuous low rate irradiation (CIIR gene) or to acute irradiation (High dose 200 Gy): rep :repressed ; ind : induced ; no : no variation).



**Figure S1**

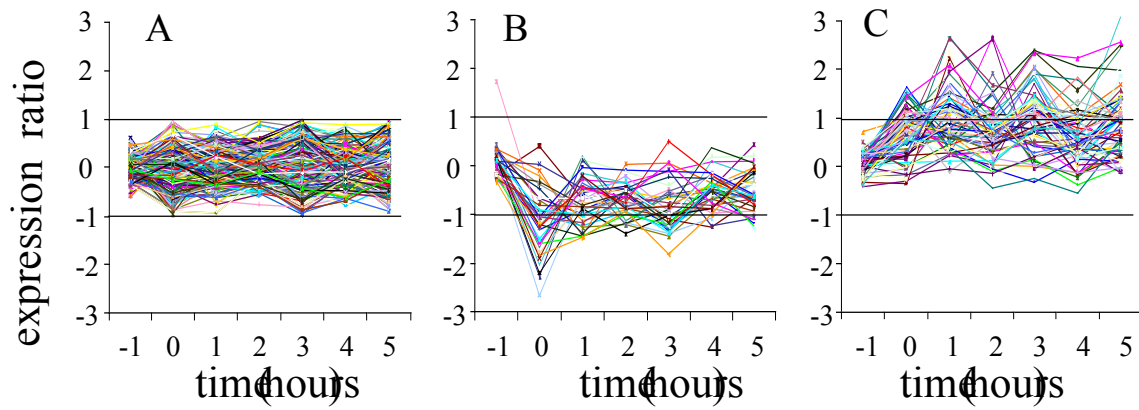

**Figure S1: Kinetics of expression of CIIR genes exposed to a 200Gy acute irradiation.** Panel A: genes not affected by acute irradiation; Panel B: repressed genes; Panel C: induced genes. The lists of the genes are given in Table S1.
